# Supplementary material for: Clinical‐Grade Isolated Human Kidney Perivascular Stromal Cells as an Organotypic Cell Source for Kidney Regenerative Medicine
Source: PubMed Central journal article supplement (PMC5442810; doi:10.5966/sctm.2016-0053), 2016-09-20
Supplement: SCT3-6-405-s001.pdf [file SCT3-6-405-s001.pdf]

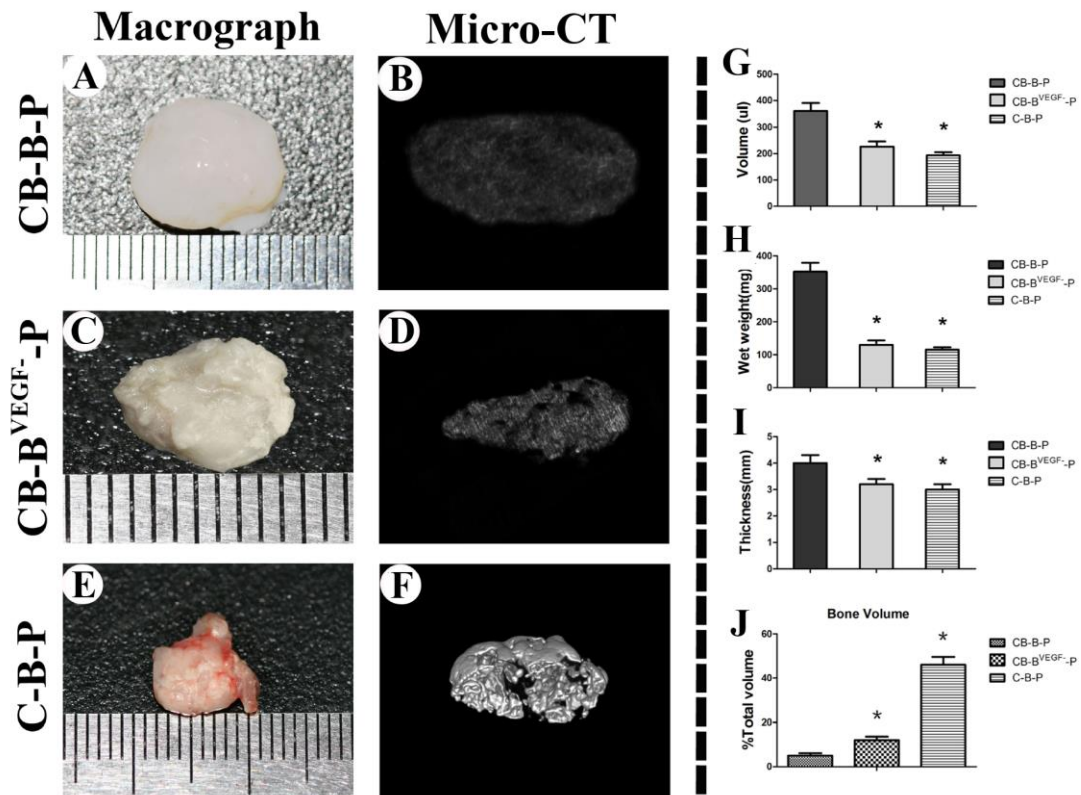

**Figure S1.** Morphological evaluation of CB-B-P, CB-B<sup>VEGF</sup>-P and C-B-P constructs after 12 weeks' *in vivo* incubation. **(A)**, **(C)** and **(E)** presented representative appearances of specimens from each group. **(B)**, **(D)** and **(F)** showed Micro-CT scanning for these samples. Quantitative measurement of samples presented different volume **(G)**, weight **(H)** and thickness **(I)**, and ossified tissue percentage based on CT analysis **(J)**, n=4, \* denotes  $p < 0.05$ .

**Table S1 Gene primer sequence for Real time RT-PCR**

| <b>Genes</b> | <b>Primers</b>                           |
|--------------|------------------------------------------|
| SOX-9        | Forward 5' -AATCTCCTGGACCCCTTCAT-3'      |
|              | Reverse 5'-GTCCTCCTCGCTCTCCTTCT-3'       |
| RUNX-2       | Forward 5 '-CGGAATGCCTCTGCTGTTAT-3'      |
|              | Reverse 5'-TTCCCGAGGTCCATCTACTG-3'       |
| Collagen-X   | Forward 5 '-GGGATGCCTCTTGTCAAGTGC-3'     |
|              | Reverse 5'-ATCTTGGGTCATAGTGCTGCTG-3'     |
| VEGF         | Forward 5 '- ATCGAGACCTTGGTGGAC-3'       |
|              | Reverse 5'- CCTGGTGAGGTTTGATCC-3'        |
| GAPDH        | Forward 5 '-TGGTATCGTGGAAAGGACTCATGAC-3' |
|              | Reverse 5'-ATGCCAGTGACGTTCCCGTTCAGC-3'   |
